# Supplementary material for: Lipolysis of domestic wastewater in anaerobic reactors operating at low temperatures
Source: Royal Society of Chemistry journal article supplement (doi:10.1039/c8ew00156a), 2018-01-01
Supplement: c8ew00156a1.pdf [file c8ew00156a1.pdf]

# 1 Lipolysis of Domestic Wastewater in Anaerobic Reactors Operating at 2 Low Temperatures.

3

4 Evangelos Petropoulos<sup>a</sup>, Jan Dolfig<sup>a</sup>, Yongjie Yu<sup>a, b</sup>, Matthew J. Wade<sup>a</sup>, Emma J. Bowen<sup>a</sup>, Russell J. Davenport<sup>a</sup>, Thomas P. Curtis<sup>a</sup>

5 <sup>a</sup>*School of Engineering, Newcastle University, Newcastle-upon-Tyne, NE1 7RU England, UK*

6 <sup>b</sup>*State Key Laboratory of Soil and Sustainable Agriculture, Institute of Soil Science, Chinese Academy of Sciences, Nanjing, 210008,*

7 *P.R. China*

8

9 SUPPLEMENTARY MATERIAL

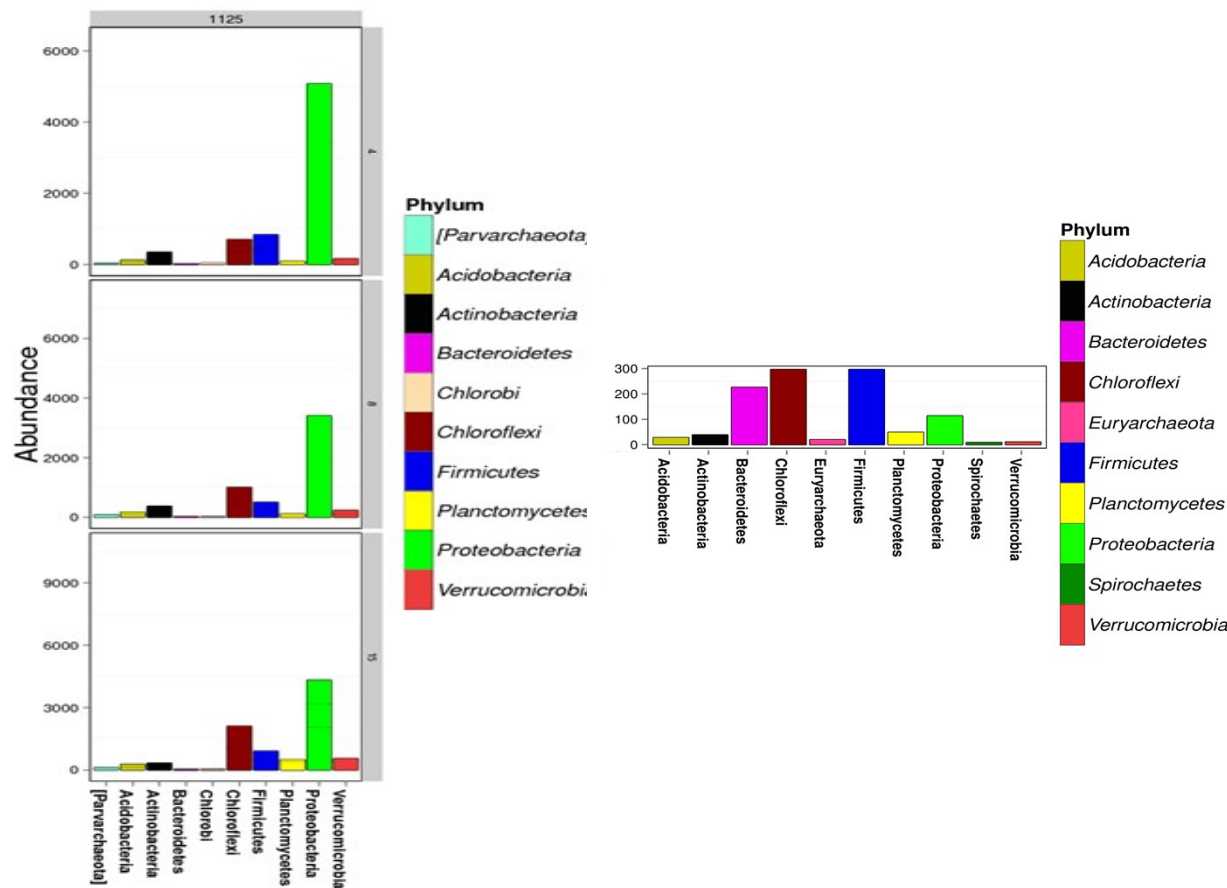

10

11 Fig. I – Absolute abundance of left) bacterial phyla developed in the anaerobic reactors operating at 4, 8 and 15 °C;

12 right) bacterial phyla in the raw wastewater (substrate).

13

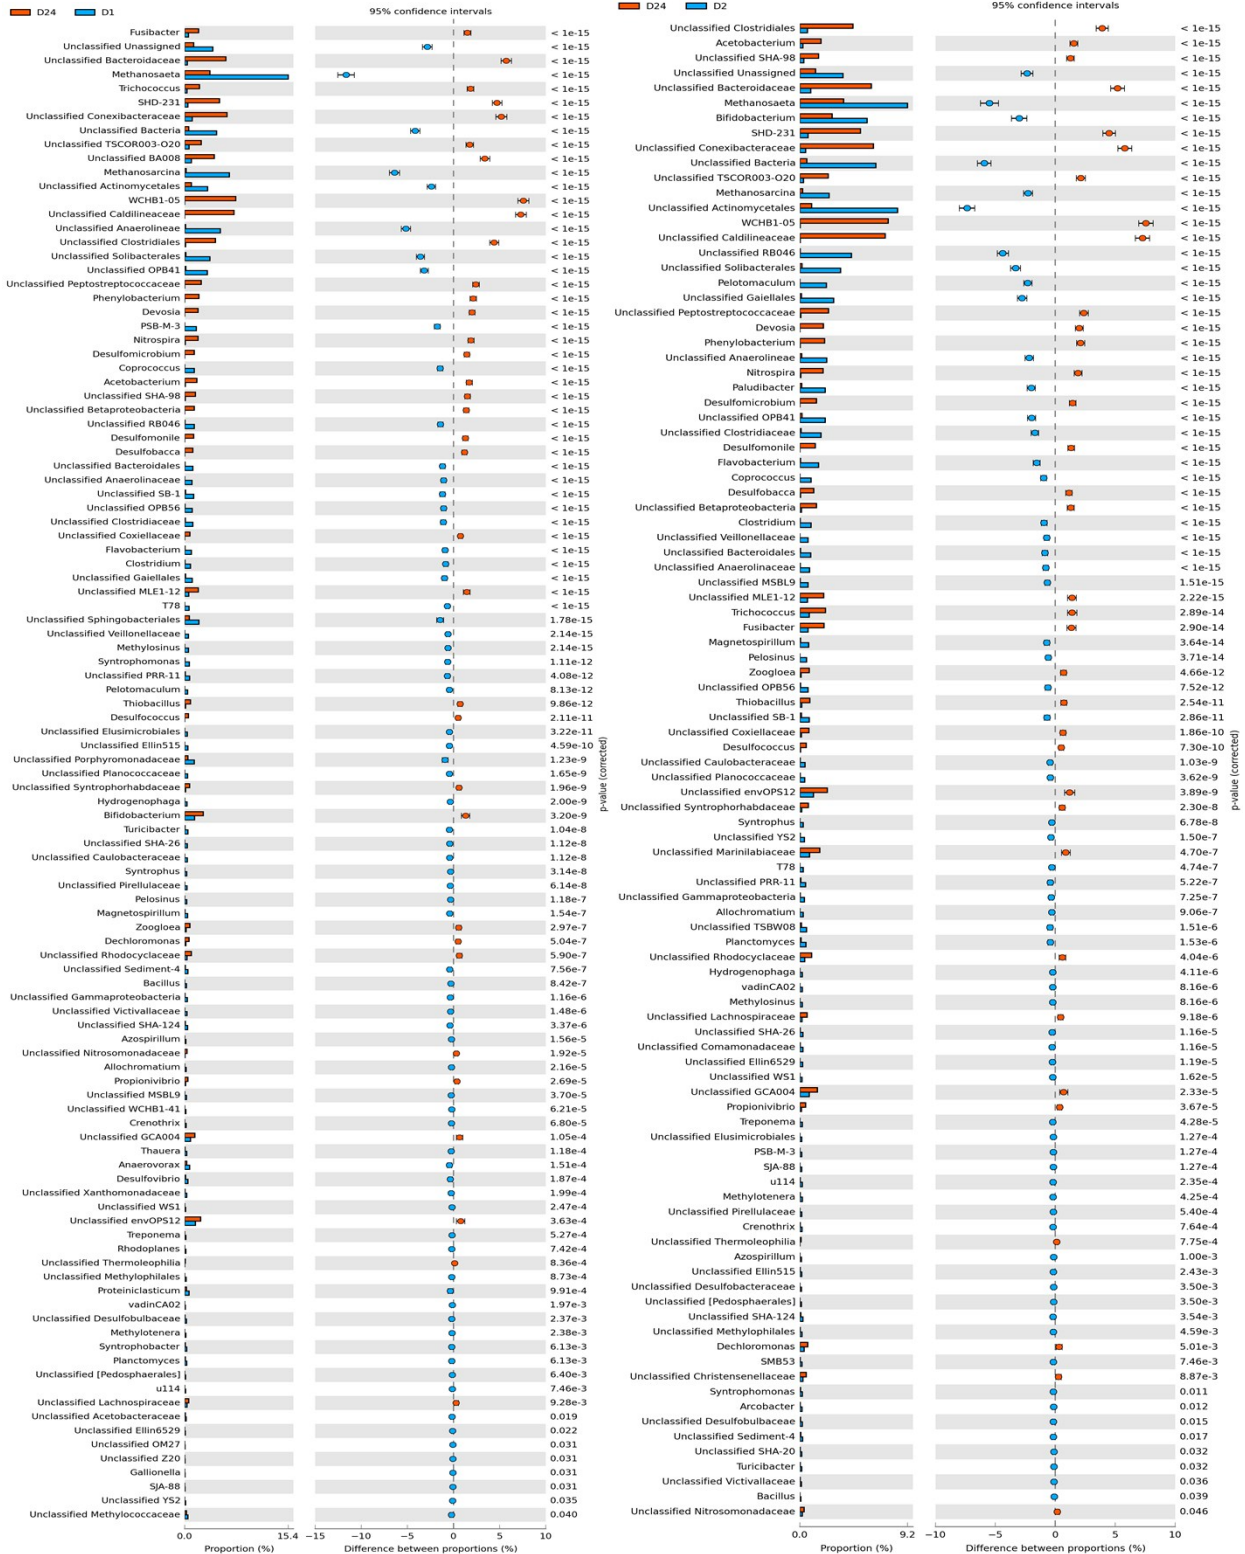

14

15 Fig II. –Significance of the differences between the top100 sequenced genera in the 4°C reactor replicates and the  
 16 wastewater (White's non-parametric t-test); D1, 2 the 4°C reactors, D24 the WW sample.

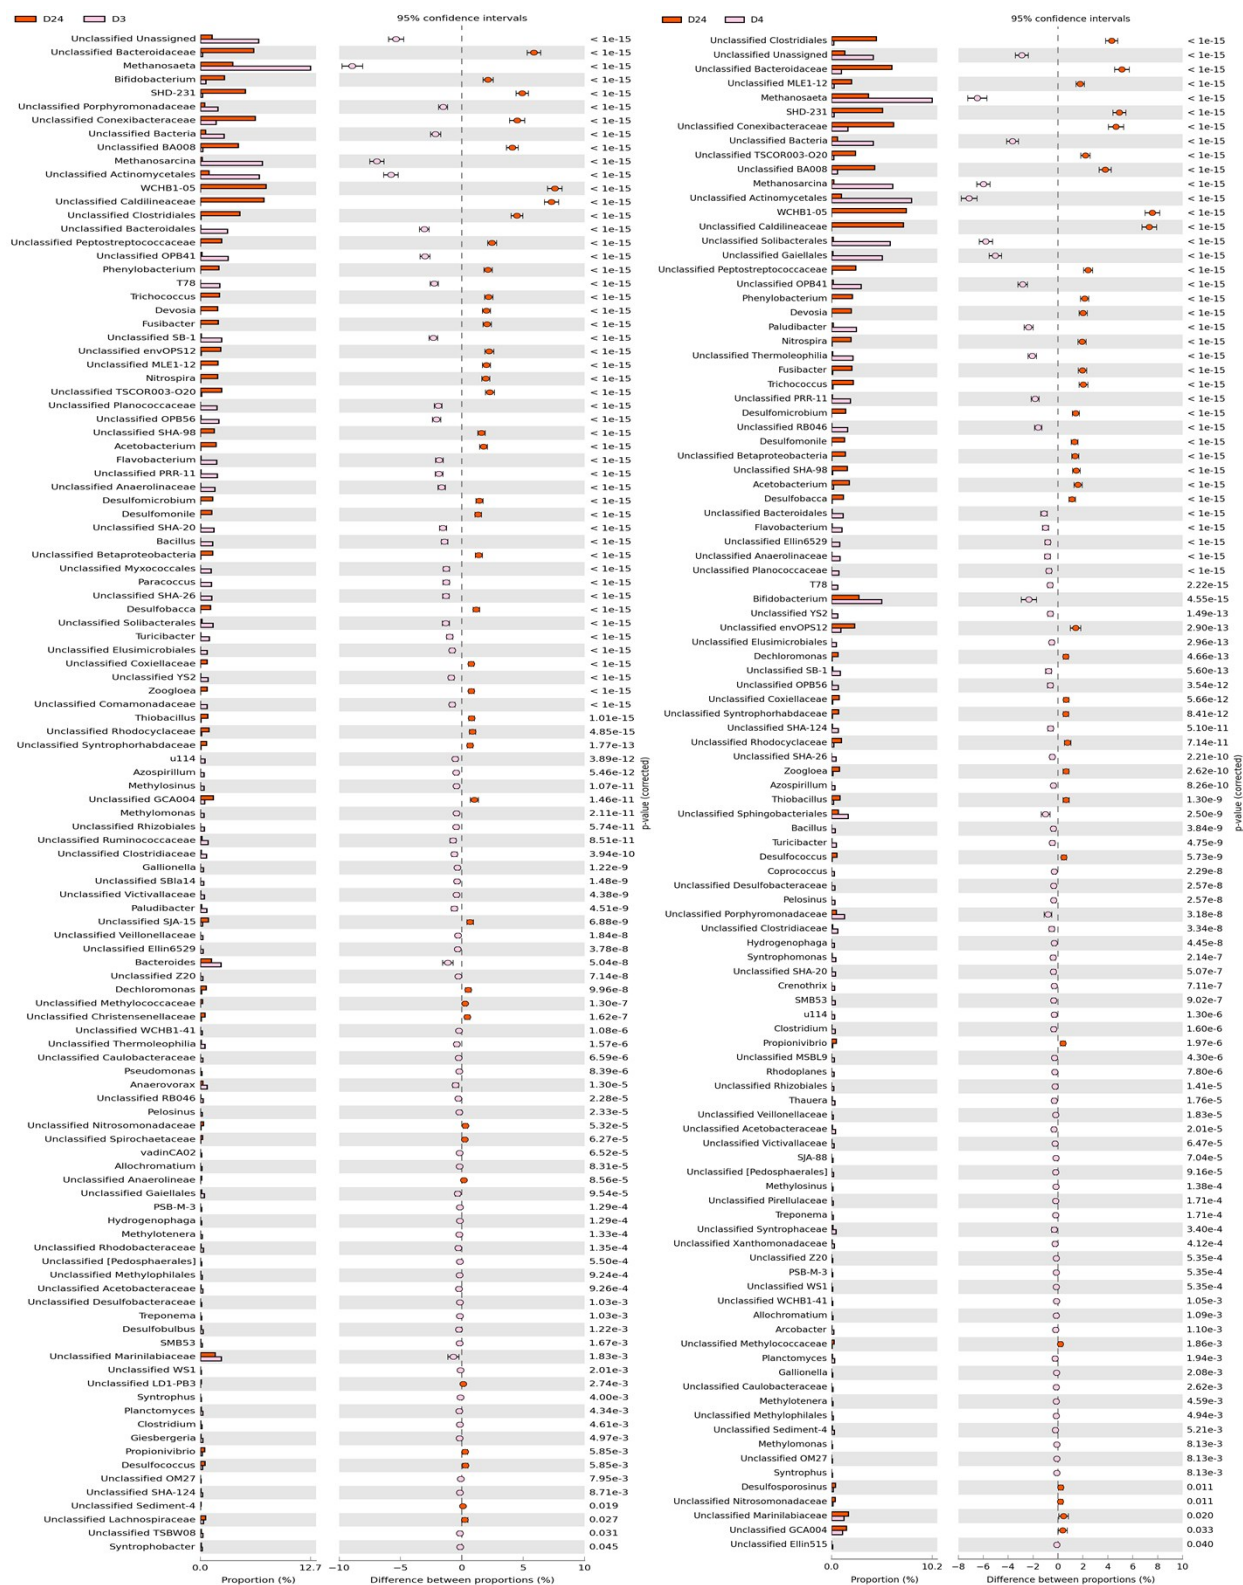

17

18 Fig III. –Significance of the differences between the top100 sequenced genera developed in the 8°C reactor replicates  
19 and the wastewater (White's non-parametric t-test); D3, 4 the 8°C reactors, D24 the WW sample.



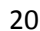

22
